# Supplementary material for: Oxygen reduction electrocatalysts based on spatially confined cobalt monoxide nanocrystals on holey N-doped carbon nanowires: the enlarged interfacial area for performance improvement
Source: Royal Society of Chemistry journal article supplement (doi:10.1039/c5ta05757d), 2015-01-01
Supplement: c5ta05757d1.pdf [file c5ta05757d1.pdf]

## Electronic Supplementary Information for

# Oxygen Reduction Electrocatalyst Based on Spatially Confined Cobalt Monoxide Nanocrystals on Holey N-Doped Carbon Nanowire : the Enlarged Interfacial Area for Performance Improvement

Jiaoxing Xu,<sup>a,b</sup> Qiangmin Yu,<sup>a,b</sup> Chuxin Wu,<sup>a,b</sup> Lunhui Guan<sup>a,b\*</sup>

<sup>a</sup> Key Laboratory of Design and Assembly of Functional Nanostructures, Fujian Institute of Research on the Structure of Matter, Chinese Academy of Sciences, Fuzhou 350002, China. Tel./Fax: 86-591-63173550. E-mail: guanlh@fjirsm.ac.cn.

<sup>b</sup> Fujian provincial key laboratory of nanomaterials, Fuzhou, Fujian 350002, China

## 1. Additional experimental data

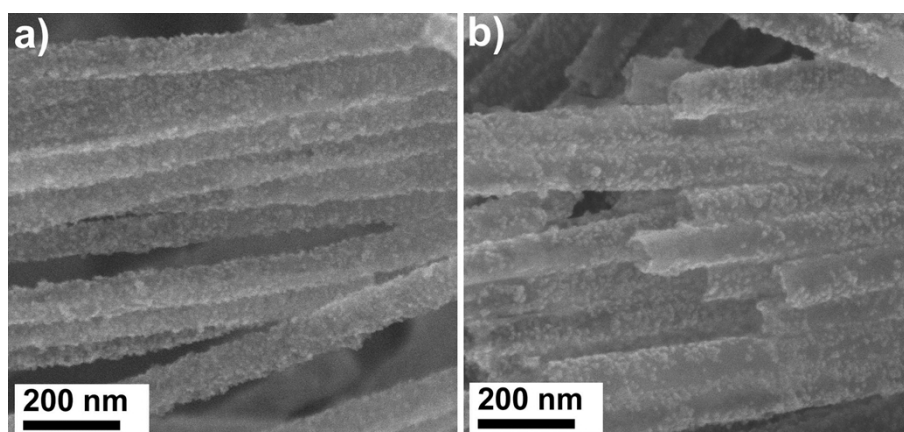

Fig. S1. SEM image of (a) CoO/NCW and (b) CoO/NCT sample.

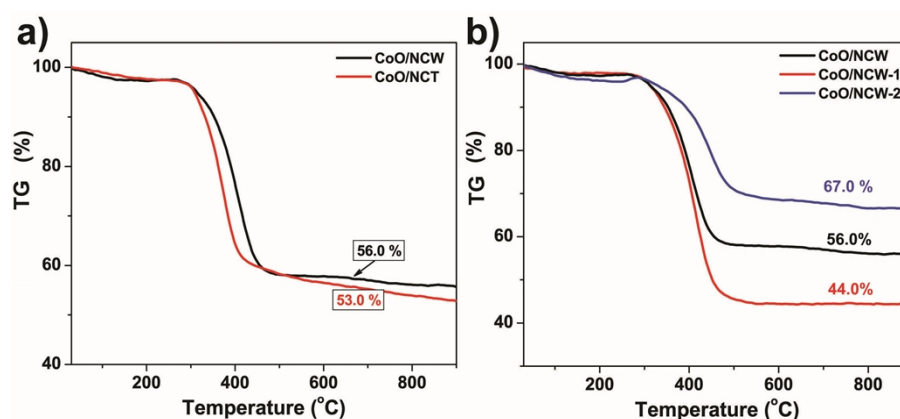

Fig. S2. TG analysis of (a) the CoO/NCW and CoO/NCT hybrids and (b) CoO/NCW samples with different CoO contents.

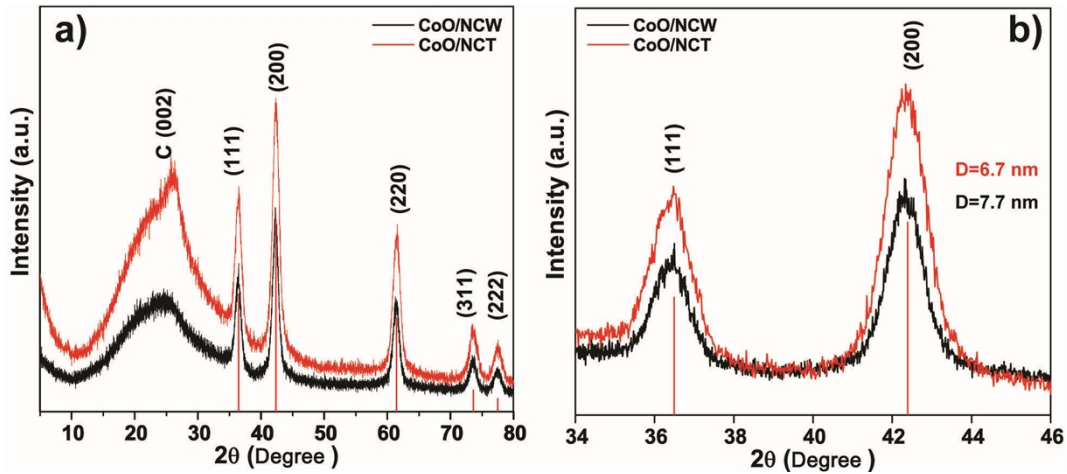

Fig. S3. (a) XRD patterns of the CoO/NCW and CoO/NCT hybrids and (b) The enlarged show of the diffraction peaks of (111) and (200), the crystalline diameter ( $D$ ) calculated by Scherrer formula from the most intense diffraction peak (200) was 6-7 nm.

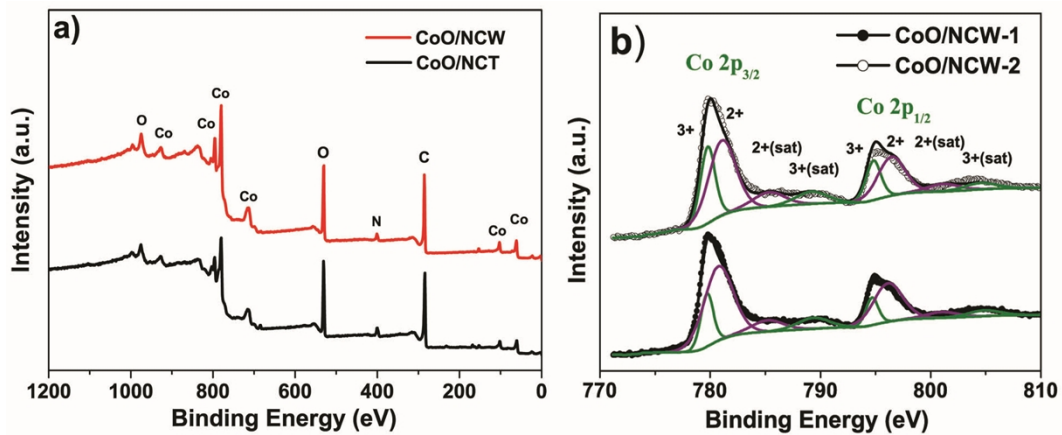

Fig. S4. (a) XP survey spectra of the CoO/NCW and CoO/NCT hybrids and (b) High-resolution Co 2p spectra of CoO/NCW-1 and CoO/NCW-2.

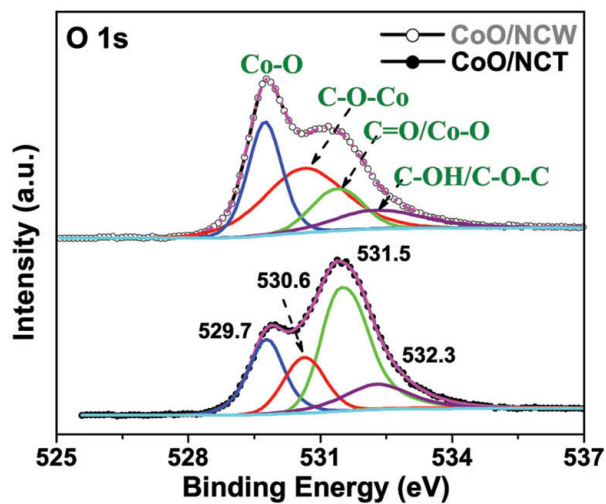

Fig. S5. High-resolution XP O 1s spectra of CoO/NCW and CoO/NCT.

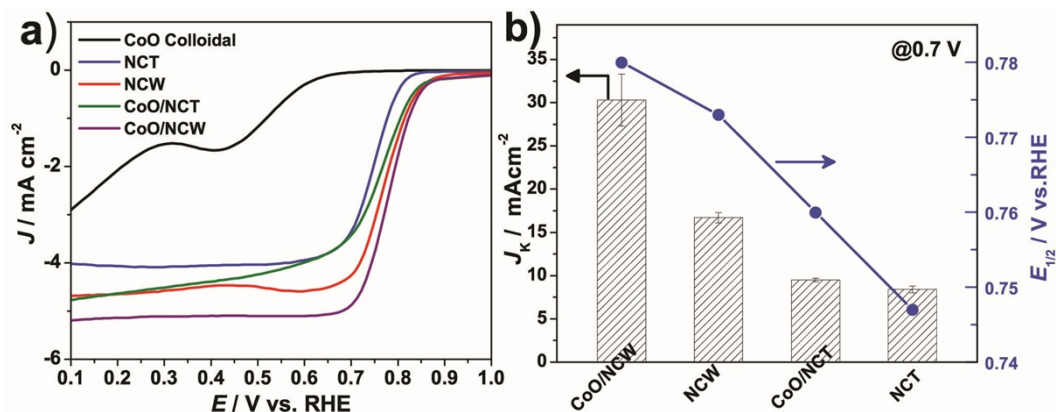

**Fig. S6** (a) LSV Curves of the CoO NPs, NCT, NCW, CoO/NCT and CoO/NCW nanocomposite and (b) the corresponding given electrocatalytic activity in term of half-wave potential ( $E_{1/2}$ ) and kinetic-limiting current density.

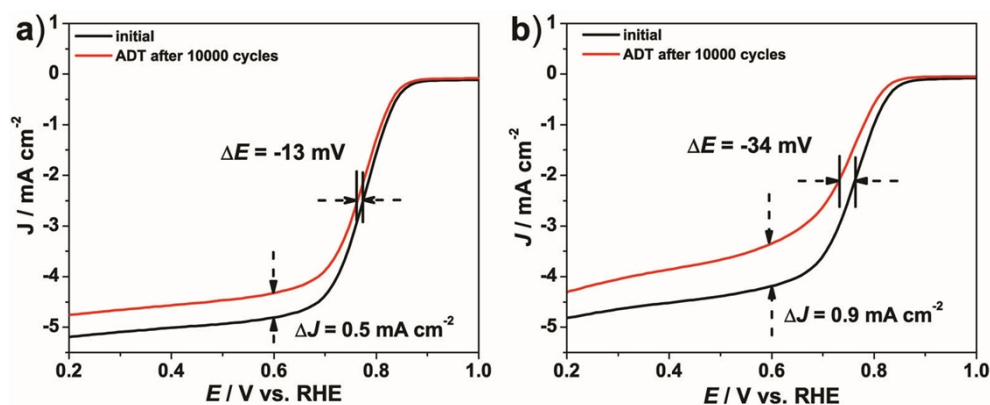

**Fig.7** The accelerated durability by CV-cycling the catalyst of CoO/NCW (a) and CoO/NCT (b) between 0.6 and 1.0 V at  $100 \text{ mVs}^{-1}$  under  $\text{O}_2$ -atmosphere.

**Table S1.** ICP analysis of the residual of Fe/Co metals in NCW sample.

| Sample | Fe / wt. % | Co / wt. % | Al / wt. % |
|--------|------------|------------|------------|
| NCW    | 0.38       | 0.33       | 0.12       |

**Table S2.** Physicochemical properties and the electrocatalytic activity of the N-CT and N-CW sample for ORR.

| Catalysts | SA <sup>a)</sup>                   | PV <sup>b)</sup>                    | PSD <sup>c)</sup> | At% <sup>d)</sup> |    |     |
|-----------|------------------------------------|-------------------------------------|-------------------|-------------------|----|-----|
|           | [m <sup>2</sup> ·g <sup>-1</sup> ] | [cm <sup>3</sup> ·g <sup>-1</sup> ] | [nm]              | N                 | C  | O   |
| N-CT      | 109                                | 0.91                                | 65                | 9.2               | 84 | 6.4 |
| N-CW      | 176                                | 0.48                                | 1.4/22            | 7.2               | 86 | 6.2 |

<sup>a)</sup> Specific surface area from multiple BET method; <sup>b)</sup> Total pore volume at P/P<sub>0</sub> = 0.99; <sup>c)</sup> Pore size distribution, estimated using the nonlocal density functional theory for N-CWs (assuming slit pore geometry) and the Barrett–Joyner–Halenda formula for N-CT (cylindrical pore geometry); <sup>d)</sup> Atomic ratio data from XPS analyses.

**Table S3.** The interfacial area characterized by the amounts of the electrochemically-available Co(II)/ Co(III) redox centers and the electrocatalytic activity of the CoO/KB, CoO/NCT and CoO/NCW samples for ORR in comparison with the commercial Pt/C catalyst.

| Catalyst | The charge of the oxidizing peak @1.1 V [C] | $E_{\text{onset}} / E_{1/2}$ [mV/mV] | $J_K @ 0.7V$ [mA·cm <sup>-2</sup> ] | $n$ (RRDE) |
|----------|---------------------------------------------|--------------------------------------|-------------------------------------|------------|
| CoO/KB   | 1.46 x 10 <sup>-3</sup>                     | 0.875/0.75                           | 5.6                                 | 3.3        |
| CoO/NCT  | 1.04x 10 <sup>-3</sup>                      | 0.875/0.76                           | 9.7                                 | 3.67       |
| CoO/NCW  | 2.46x10 <sup>-3</sup>                       | 0.895/0.78                           | 30.3                                | 3.83       |
| Pt/C     | --                                          | 0.950/0.80                           | 23.1                                | 4.0        |

## 2. Koutechy-Levich equations and the transfer electron number calculations

The transfer electron number per oxygen molecule involved in the oxygen reduction at N-CW and N-CT electrodes was determined on the basis of the Koutechy-Levich equation<sup>2,3</sup> given below:

$$\frac{1}{J} = \frac{1}{J_L} + \frac{1}{J_K} = \frac{1}{B\omega^{1/2}} + \frac{1}{J_K} \quad (1)$$

$$B = 0.62nFC_0(D_0)^{2/3}\nu^{-1/6} \quad (2)$$

$$J_K = nF\kappa C_0 \quad (3)$$

where  $J_K$  is the kinetics current density,  $J$  is the measured current density of the ORR,  $n$  represents the number of electrons transferred per oxygen molecule,  $F$  is the Faraday constant

(  $F = 96485 \text{ C}\cdot\text{mol}^{-1}$  ),  $C_0$  is the bulk concentration of  $\text{O}_2$  (  $= 1.2 \times 10^{-3} \text{ mol}\cdot\text{L}^{-1}$  ),  $D_0$  is the diffusion coefficient of  $\text{O}_2$  in the NaOH electrolyte (  $= 1.9 \times 10^{-5} \text{ cm}^2 \text{ S}^{-1}$  ),  $\nu$  is the kinetic viscosity of the electrolyte (  $= 0.01 \text{ cm}^2 \text{ S}^{-1}$  ),  $\kappa$  is the electron-transfer rate constant and  $\omega$  is the angular velocity of the the disk (  $\omega = 2\pi N$ ,  $N$  is the linear rotation speed ). According to Eqs. (1) and (2), the number of electrons transferred ( $n$ ) and  $J_{\kappa}$  can be obtained from the slope and intercept of the K-L plots, respectively.

## Reference

1. H. Chen, Y. Yang, Z. Hu, K. F. Huo, Y. W. Ma, Y. Chen, X. S. Wang and Y. N. Lu, *J Phys Chem B*, 2006, **110**, 16422-16427.
2. W. Chen, S. W. Chen, *Angew Chem Int Ed*, 2009, **48**, 4386-4389.
3. J. X. Xu, G. F. Dong, C. H. Jin, M. H. Huang, L. H. Guan, *ChemSusChem*, 2013, **6**, 493-499.
